# Supplementary material for: Black Parenting Couples’ Discussions of the Racial Socialization Process: Occurrence and Effectiveness
Source: Springer Nature journal article supplement (doi:10.1007/s10826-018-1248-4), 2018-09-15
Supplement: MOESM1 [file 16127902]

*Actor and Partner Effect by Gender for Racial Identity (Self-reported Effectiveness)*

| Effect | Mother | Sig. | Father | Sig. |
| --- | --- | --- | --- | --- |
| **Actor Effect** |  |  |  |  |
| Centrality | .10 | No | .73 | No |
| Public Regard | .80 | Yes | -.69 | Trend |
| Private Regard | .23 | No | .91 | No |
| Assimilationist | -.55 | No | -.08 | No |
| Humanist | -1.09 | Yes | -.02 | No |
| Nationalist | .72 | No | -.5 | No |
| Minority | .13 | No | -.42 | No |
| **Partner Effect** |  |  |  |  |
| Centrality | -.02 | No | .48 | No |
| Public Regard | -.54 | Trend | .11 | No |
| Private Regard | .50 | No | -.86 | Trend |
| Assimilationist | -.71 | Trend | -.11 | No |
| Humanist | -.23 | No | -.17 | No |
| Nationalist | -.44 | No | .44 | No |
| Minority | .16 | No | .24 | No |

*Actor and Partner Effect by Gender for Racial Identity (Observed Effectiveness)*

| Effect | Mother | Sig. | Father | Sig. |
| --- | --- | --- | --- | --- |
| **Actor Effect** |  |  |  |  |
| Centrality | .60 | Yes | .25 | No |
| Public Regard | 0 | No | .22 | No |
| Private Regard | .15 | No | -.20 | No |
| Assimilationist | -.09 | No | -.38 | Trend |
| Humanist | .16 | No | .23 | No |
| Nationalist | -.70 | Yes | -.13 | No |
| Minority | -.22 | Trend | -.10 | No |
| **Partner Effect** |  |  |  |  |
| Centrality | .02 | No | .60 | Yes |
| Public Regard | .14 | No | -.16 | No |
| Private Regard | -.22 | No | -.51 | Yes |
| Assimilationist | -.20 | No | -.18 | No |
| Humanist | .48 | Yes | -.06 | No |
| Nationalist | .23 | No | -.69 | Yes |
| Minority | -.28 | Yes | -16.0 | No |
